# Supplementary material
Source: Springer Nature journal article supplement (https://www.springermedizin.de/resource/supplementary/13601_2011_258_MOESM1_ESM.pdf/9677280)

# HoanKiem

**Nasal Blocking**  
40.2%

9.5%

2.8%

19.0%

8.9%

4.9%

2.9%

8.2%

**Runny Nose**  
39.0%

**Allergic Rhinitis**  
29.6%

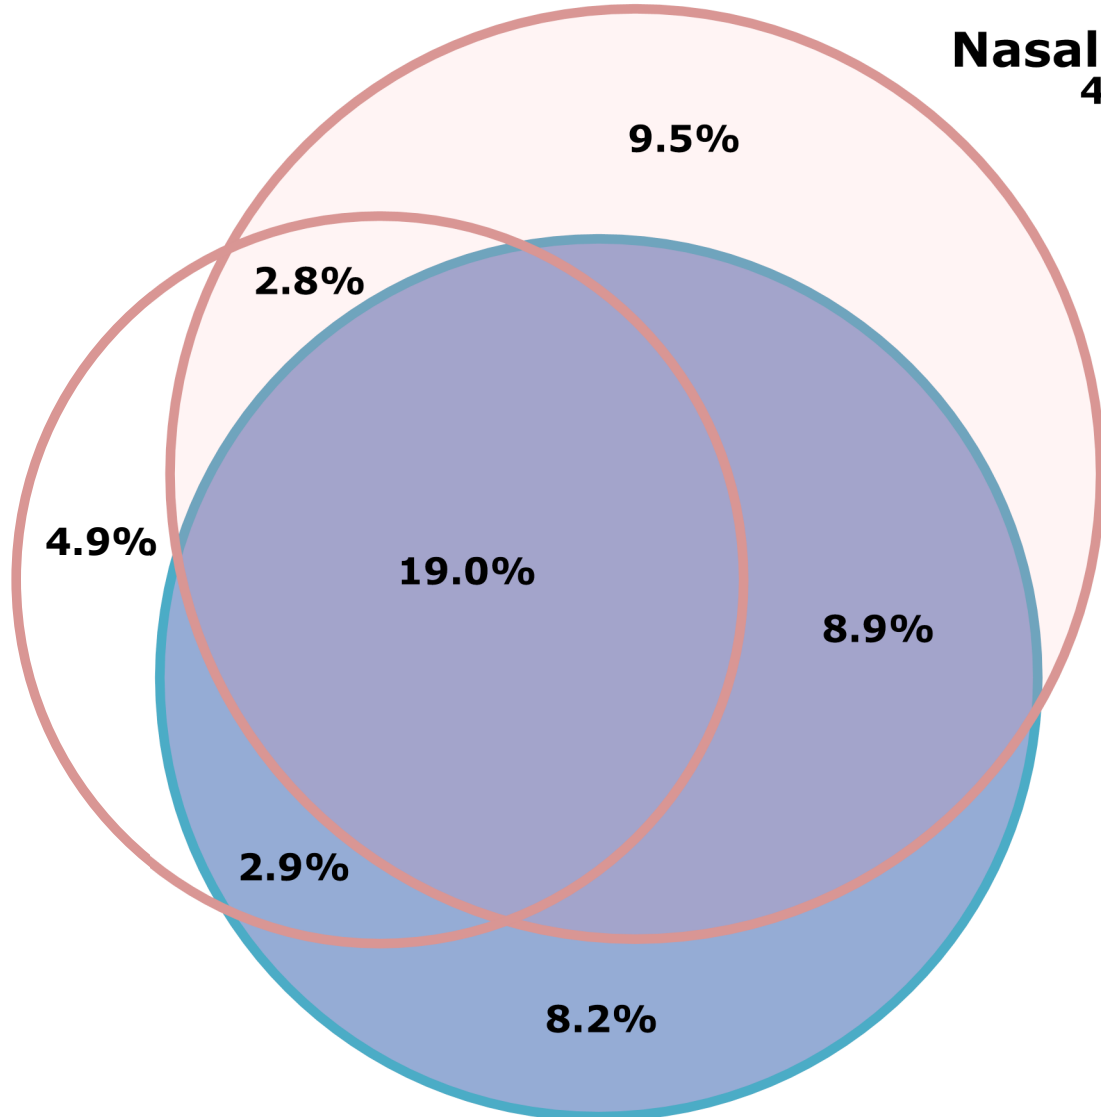

Supplement: MOESM1 [file 9677280]
